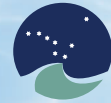

## Contribution to Special Issue: 'Towards a Broader Perspective on Ocean Acidification Research Part 2' Food for Thought CO<sub>2</sub> sensitivity experiments are not sufficient to show an effect of ocean acidification

Paul McElhany\*

NOAA Northwest Fisheries Science Center, 2725 Montlake Blvd. E, Seattle, WA 98112, USA

\*Corresponding author: tel: + 1 206 860 5608; fax: + 1 206 860 3335; e-mail: [paul.mcelhany@noaa.gov](mailto:paul.mcelhany@noaa.gov).

McElhany, P. CO<sub>2</sub> sensitivity experiments are not sufficient to show an effect of ocean acidification. – ICES Journal of Marine Science, 74: 926–928.

Received 25 November 2015; revised 26 April 2016; accepted 26 April 2016; advance access publication 8 July 2016.

The ocean acidification (OA) literature is replete with laboratory studies that report species sensitivity to seawater carbonate chemistry in experimental treatments as an “effect of OA”. I argue that this is unintentionally misleading, since these studies do not actually demonstrate an effect of OA but rather show sensitivity to CO<sub>2</sub>. Documenting an effect of OA involves showing a change in a species (e.g. population abundance or distribution) as a consequence of anthropogenic changes in marine carbonate chemistry. To date, there have been no unambiguous demonstrations of a population level effect of anthropogenic OA, as that term is defined by the IPCC.

**Keywords:** climate change, CO<sub>2</sub> sensitivity experiments, ocean acidification.

Ocean acidification (OA) can be defined as the reduction in ocean pH caused primarily (but not exclusively) by the uptake of CO<sub>2</sub> from the atmosphere (IPCC, 2011). Anthropogenic OA refers to the human-caused reduction in ocean pH and is the primary focus of nearly all articles on this topic. Demonstrating an effect of anthropogenic OA on a species or in a single long-lived individual requires demonstrating a change in the species living in the wild in response to the changes that have occurred and are occurring in ocean carbonate chemistry. This criterion for demonstrating a biological effect of OA raises three key issues: (i) can a laboratory study show an effect of OA, (ii) what evidence is needed to directly show an effect of OA, and (iii) has an effect of OA already been observed. This comment primarily addresses the first issue and its implications, with a brief foray into the other two topics.

Laboratory experiments testing species sensitivity to increased CO<sub>2</sub> are a common way to assess the potential effects of OA on marine organisms. It is common in the literature to refer to these experiments as studying the “effect of OA”. A review of 393 papers describing CO<sub>2</sub> sensitivity experiments found that ~40% include some variation of the phrase “effect of OA” in the title (database by Busch and McElhany, in review), and the majority of presentations at the American Fisheries Society 2015 Annual

Meeting OA Symposium included some variation of that phrase in the title. I contend that applying the phrase “effect of OA” to experiments purportedly documenting the sensitivity of organisms to increased CO<sub>2</sub> is unintentionally misleading because the phrase implies that the changes in ocean chemistry that have already occurred have affected the species in the wild. Laboratory exposure experiments do not show that the species has been affected by a change in ocean chemistry – they simply show sensitivity, in a laboratory setting, to the chemistry changes that occur in seawater with increased CO<sub>2</sub>. Likewise, snapshot studies showing different biological performance in locations with different contemporary carbonate chemistry do not directly demonstrate the effect of changing ocean chemistry (e.g. Bednaršek *et al.*, 2014). Although laboratory experiments and spatial observations are essential approaches for predicting potential effects of OA, they are not sufficient to demonstrate an effect of OA.

Demonstrating an effect of OA can most directly be accomplished by correlating a time series of abundance or other species attribute with a time series of changes in ocean carbonate chemistry and simultaneously demonstrating that the change in the species (or long-lived individual) was caused by the change in carbonate chemistry. I am not aware of any studies that correlate

contemporary biological and chemical time series to directly and unambiguously demonstrate an effect caused by anthropogenic OA. The lack of correlative time series is not a surprise to OA researchers – carbonate chemistry and biological data sets are noisy and short. Attributing a biological change exclusively to OA as opposed to other confounding variables, like temperature or biological interactions, is difficult, especially given the strong correlations between carbonate chemistry and other important biological drivers in the field (e.g. [Juraneck et al., 2009](#); [Reum et al., 2014](#)). In addition, modelling of historical and projected marine carbonate chemistry indicates that the greatest biological impacts of OA will be in the future rather than in the recent past ([Bopp et al., 2013](#)). Studies that potentially provide a baseline for evaluating an effect of OA are starting to accumulate for a few species such as Pacific oysters ([Barton et al., 2012](#)), pteropods ([Bednaršek et al., 2014](#)), and some corals ([Manzello et al., 2014](#); coral reef example in [Alin et al., 2015](#)), but longer time series and additional data are needed to clearly show a change in the population of these species driven by OA.

In some ways, the issue of how we describe laboratory studies is semantic quibbling. After all, the papers and presentations noted above are intended to discuss *potential* effects of OA. However, use of the phrase “the effect of OA” without qualification has important implications for how we interpret our studies and how current knowledge about the risks of OA is communicated. Implying that laboratory sensitivity studies demonstrate an effect of OA overstates the information we have about OA’s impact on contemporary natural ecosystems. This contrasts with studies examining the temperature effects of climate change. There is a large literature describing laboratory studies that measure species sensitivity to temperature (e.g. [Freitas et al., 2010](#)). These temperature sensitivity studies are generally not described as demonstrating “the effect of climate change”. Studies documenting the effect of climate change seek to show (and sometimes succeed in showing) that a change in a species in the wild was caused by a change in the earth’s climate (e.g. [Johnston et al., 2013](#); see [Parmesan et al., 2013](#) for discussion of methods).

Although it is necessary to approach claims of “ocean calamity” with scepticism ([Duarte et al., 2015](#)), there is substantial evidence that OA poses a threat to many marine ecosystems (e.g. see [Hoegh-Guldberg et al., 2014](#)). However, it is important to acknowledge that there are no studies that directly demonstrate modern day effects of OA on marine species. We can look again to the climate change-temperature analogy. Decades ago, when atmospheric scientists first projected likely temperature changes from increased anthropogenic CO<sub>2</sub>, biologists predicted substantial ecological changes based on results from laboratory studies and field correlations of species performance with spatial variability in temperature. However, in those early days, there were no studies directly documenting the effect of anthropogenic (CO<sub>2</sub>-driven) climate change on ecosystems. Now, decades later, there are many studies showing the effects of climate change on ecosystems (e.g. ocean evidence reviewed in [Hoegh-Guldberg et al., 2014](#)).

Ocean acidification research is still in the early stages of development. To advance this development, we should support establishment of co-located biological and carbonate chemistry monitoring in targeted systems, as well as re-examination of existing time series with a focus on detecting the signature of OA. Creative experimental approaches, such as [Albright et al. \(2016\)](#), can also provide information about possible recent effects of OA. The evidence is clear that the ocean is acidifying and studies

directly documenting the biological effects of OA are no doubt coming. In the meantime, it is important to use language that clearly communicates the status of OA research. Our terminology can be improved by using the phrase “sensitivity to CO<sub>2</sub>” to describe results from manipulative experiments or static field observations.

## Disclosure

The views that are expressed here are given by the author and do not necessarily reflect any position of the US Government or of NOAA.

## Acknowledgements

The author appreciates early comments on this article from Shalain Busch, Richard Feely, Robert Foy, Dwight Gledhill, and Mike Sigler.

## References

- Albright, R., Caldeira, L., Hosfelt, J., Kwiatkowski, L., Maclaren, J. K., Mason, B. M., Nebuchina, Y., *et al.* 2016. Reversal of ocean acidification enhances net coral reef calcification. *Nature*, 351: 362–365.
- Alin, S. R., Brainard, R. E., Price, N. N., Newton, J. A., Cohen, A., Peterson, W. T., DeCarlo, E. H., *et al.* 2015. Characterizing the natural system: toward sustained, integrated coastal ocean acidification observing networks to facilitate resource management and decision support. *Oceanography*, 28: 92–107.
- Barton, A., Hales, B., Waldbusser, G. G., Langdon, C., and Feely, R. A. 2012. The Pacific oyster, *Crassostrea gigas* shows negative correlation to naturally elevated carbon dioxide levels: implications for near-term ocean acidification effects. *Limnology and Oceanography*, 57: 698–710.
- Bednaršek, N., Feely, R. A., Reum, J. C. P., Peterson, B., Menkel, J., Alin, S., and Hales, B. 2014. *Limacina helicina* shell dissolution as an indicator of declining habitat suitability due to ocean acidification in the California Current Ecosystem. *Proceedings of the Royal Society B: Biological Sciences*, 281: 20140123.
- Bopp, L., Resplandy, L., Orr, J. C., Doney, S. C., Dunne, J. P., Gehlen, M., Halloran, P., *et al.* 2013. Multiple stressors of ocean ecosystems in the 21st century: projections with CMIP5 models. *Biogeosciences*, 10: 6225–6245.
- Freitas, V., Cardoso, J. F., Lika, K., Peck, M. A., Campos, J., Kooijman, S. A., and van der Veer, H. W. 2010. Temperature tolerance and energetics: a dynamic energy budget-based comparison of North Atlantic marine species. *Philosophical Transactions of the Royal Society of London B Biological Sciences*, 365: 3553–3565.
- Duarte, C. M., Fulweiler, R. W., Lovelock, C. E., Martinetto, P., Saunders, M. I., Pandolfi, J. M., Gelcich, S., and Nixon, S. W. 2015. Reconsidering Ocean Calamities. *BioScience*, 65: 130–139.
- Hoegh-Guldberg, O., Cai, R., Poloczanska, E.S., Brewer, P.G., Sundby, S., Hilmi, K., Fabry, V.J., *et al.* 2014. The ocean. *In* *Climate Change 2014: Impacts, Adaptation, and Vulnerability. Part B: Regional Aspects. Contribution of Working Group II to the Fifth Assessment Report of the Intergovernmental Panel on Climate Change*, pp. 1655–1731. Ed. by V. R. Barros, C. B. Field, D. J. Dokken, M. D. Mastrandrea, K. J. Mach, T. E. Bilir, M. Chatterjee, *et al.* Cambridge University Press, Cambridge, United Kingdom and New York, NY. 688 pp.
- IPCC. 2011. Workshop on Impacts of Ocean Acidification on Marine Biology and Ecosystems. Published September 2011 by the IPCC Working Group II Technical Support Unit, Carnegie Institution, Stanford, California, United States of America, and the IPCC Working Group I Technical Support Unit, University of Bern, Bern, Switzerland. 37 p.

- Johnston, A., Ausden, M., Dodd, A. M., Bradbury, R. B., Chamberlain, D. E., Jiguet, F., Thomas, C. D., *et al.* 2013. Observed and predicted effects of climate change on species abundance in protected areas. *Nature Climate Change*, 3: 1055–1061.
- Juranek, L. W., Feely, R. A., Peterson, W. T., Alin, S. R., Hales, B., Lee, K., Sabine, C. L., *et al.* 2009. A novel method for determination of aragonite saturation state on the continental shelf of central Oregon using multi-parameter relationships with hydrographic data. *Geophysical Research Letters*, 36: L24601.
- Manzello, D. P., Enochs, I. C., Bruckner, A., Renaud, P. G., Kolodziej, G., Budd, D. A., Carlton, R., *et al.* 2014. Galápagos coral reef persistence after ENSO warming across an acidification gradient. *Geophysical Research Letters*, 41: 9001–9008.
- Parmesan, C., Burrows, M. T., Duarte, C. M., Poloczanska, E. S., Anthony, J., Richardson, A. J., Schoeman, D. S., *et al.* 2013. Beyond climate change attribution in conservation and ecological research. *Ecology Letters*, 16: 58–71.
- Reum, J. C. P., Alin, S. R., Feely, R. A., Newton, J., Warner, M., and McElhany, P. 2014. Seasonal carbonate chemistry covariation with temperature, oxygen, and salinity in a fjord estuary: implications for the design of ocean acidification experiments. *PLoS ONE*, 9: e89619.

*Handling editor: Howard Browman*
